# Supplementary material for: New altitudinal records of Panthera onca (Carnivora: Felidae) in the Andean region of Ecuador
Source: publisher site journal article supplement (doi:10.1515/mammalia-2021-0136), 2021-12-15
Supplement: Supplementary file 1 [file j_mammalia-2021-0136_suppl_001.docx]

**Supplementary material**

**New altitudinal records of *Panthera onca* (Carnivora: Felidae) in the Andean region of Ecuador**

Daniel M. Griffith et al.

DOI 10.1515/mammalia-2021-0136

**Supplementary Figure S1:** Potential jaguar prey speciesrecorded using camera trapsin the Sangay‑Podocarpus Connectivity Corridor and surrounding region between 2018 and 2019. (A) *Cuniculus paca*, (B) *Pecari tajacu*, (C) *Tapirus pinchaque* (D) *Mazama rufina*, (E) *Mazama* sp. and (F) *Didelphis pernigra.*
